# Supplementary material for: Copper-catalyzed aromatic C–H alkoxylation with alcohols under aerobic conditions
Source: Royal Society of Chemistry journal article supplement (doi:10.1039/c6ob02582j), 2017-01-01

# **Copper-catalyzed aromatic C–H alkoxylation with alcohols under aerobic conditions**

Wenkui Lu,<sup>†</sup> Hui Xu,<sup>†,‡</sup> and Zengming Shen<sup>\*†</sup>

<sup>†</sup>*School of Chemistry and Chemical Engineering, Shanghai Jiao Tong University, 800 Dongchuan Road, Shanghai 200240, China*

<sup>‡</sup>*Department of Chemistry, College of Life and Environment Sciences, Shanghai Normal University, 100 Guilin Road, Shanghai, 200234, China*

*E-mail: [shenzengming@sjtu.edu.cn](mailto:shenzengming@sjtu.edu.cn)*

## **Supporting Information**

## Copies of $^1\text{H}$ NMR and $^{13}\text{C}$ NMR of new compounds

### Compound 3a

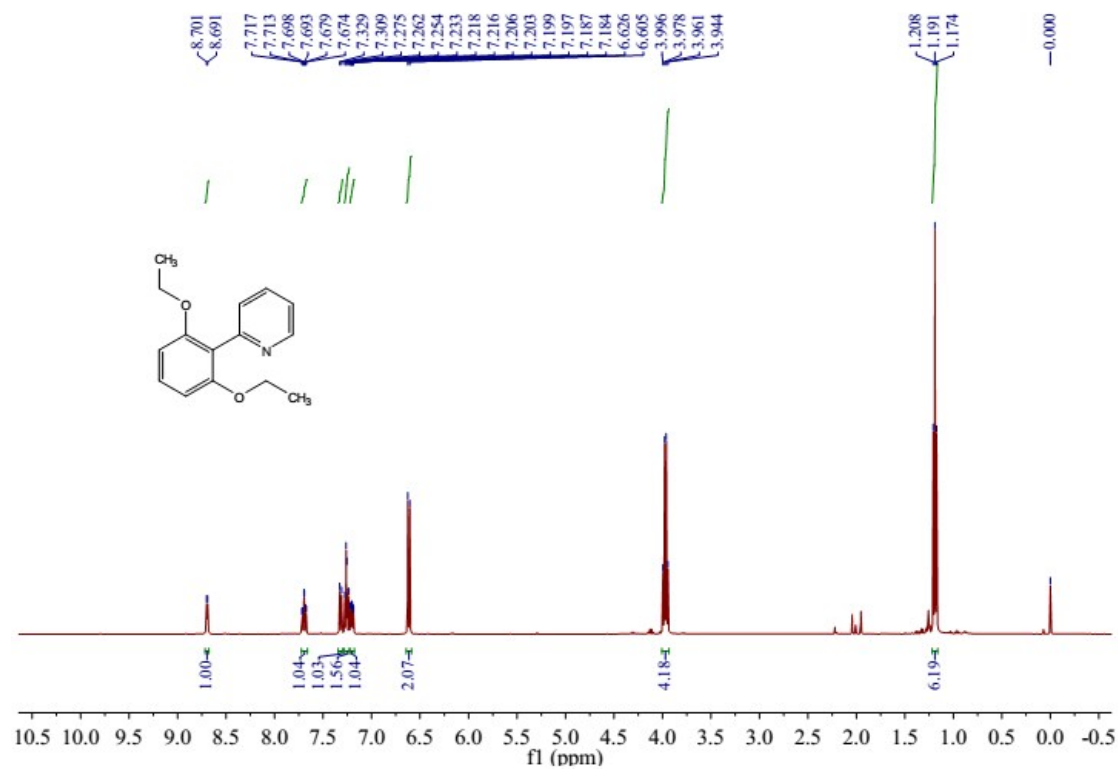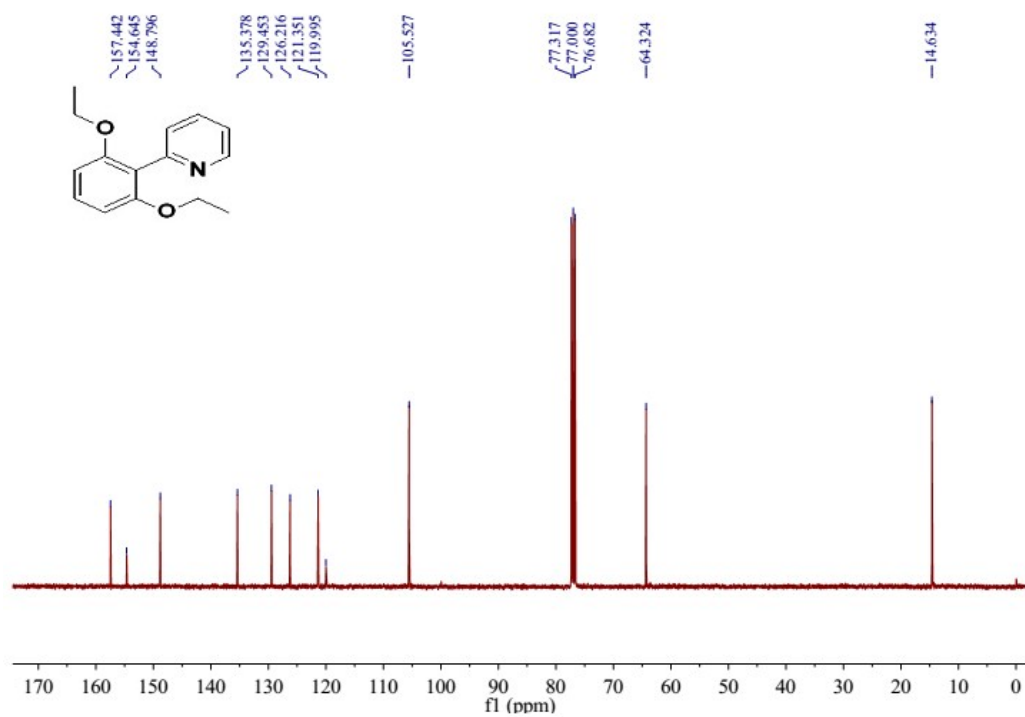

## Compound 5a

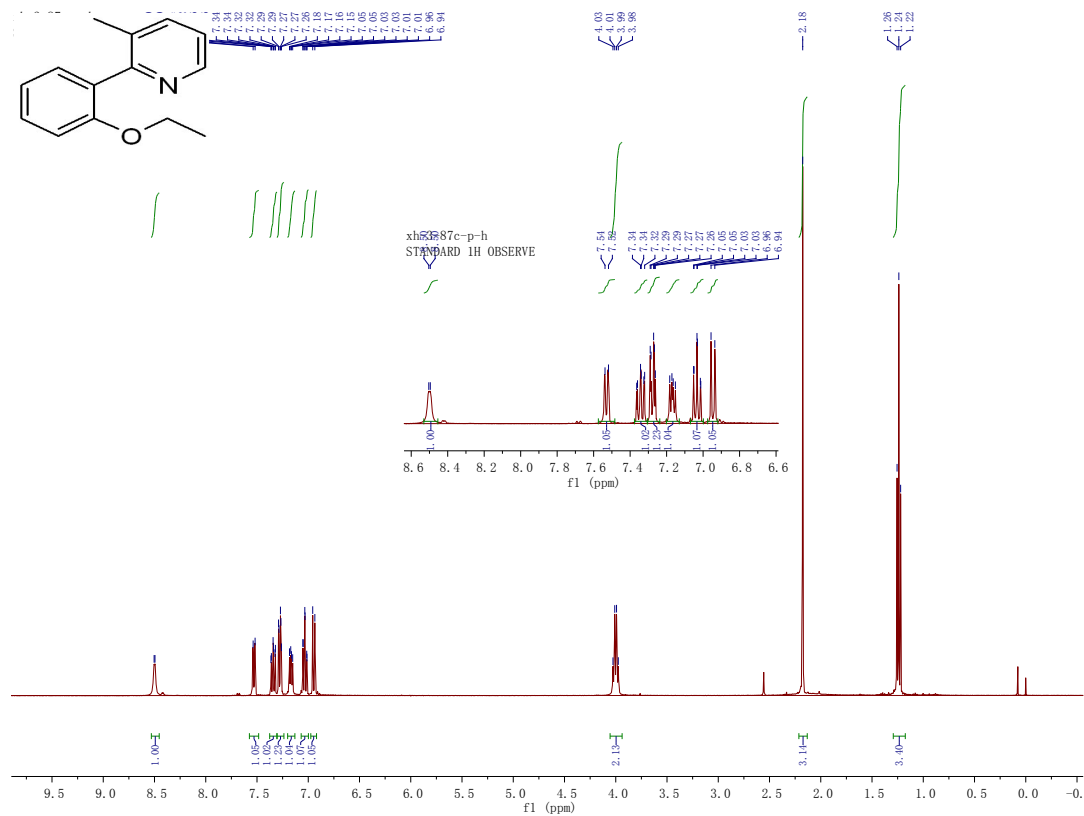

## Compound 5a

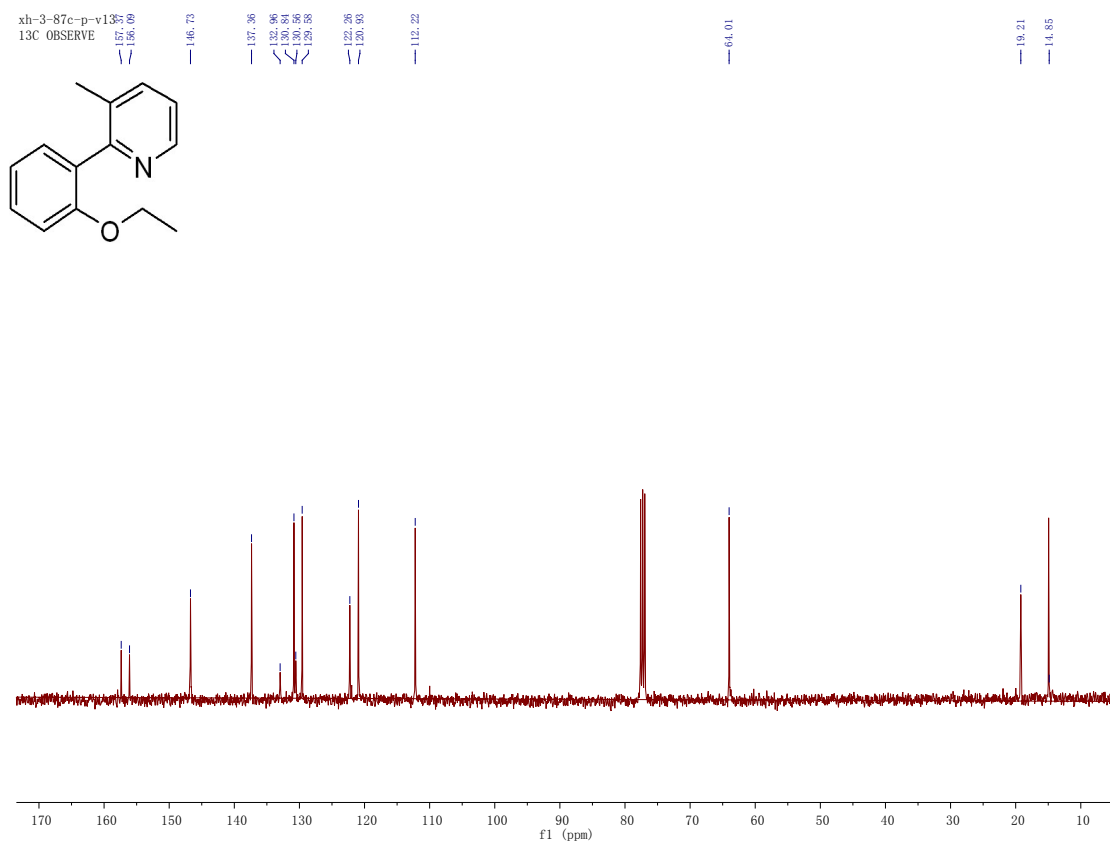

## Compound 5b

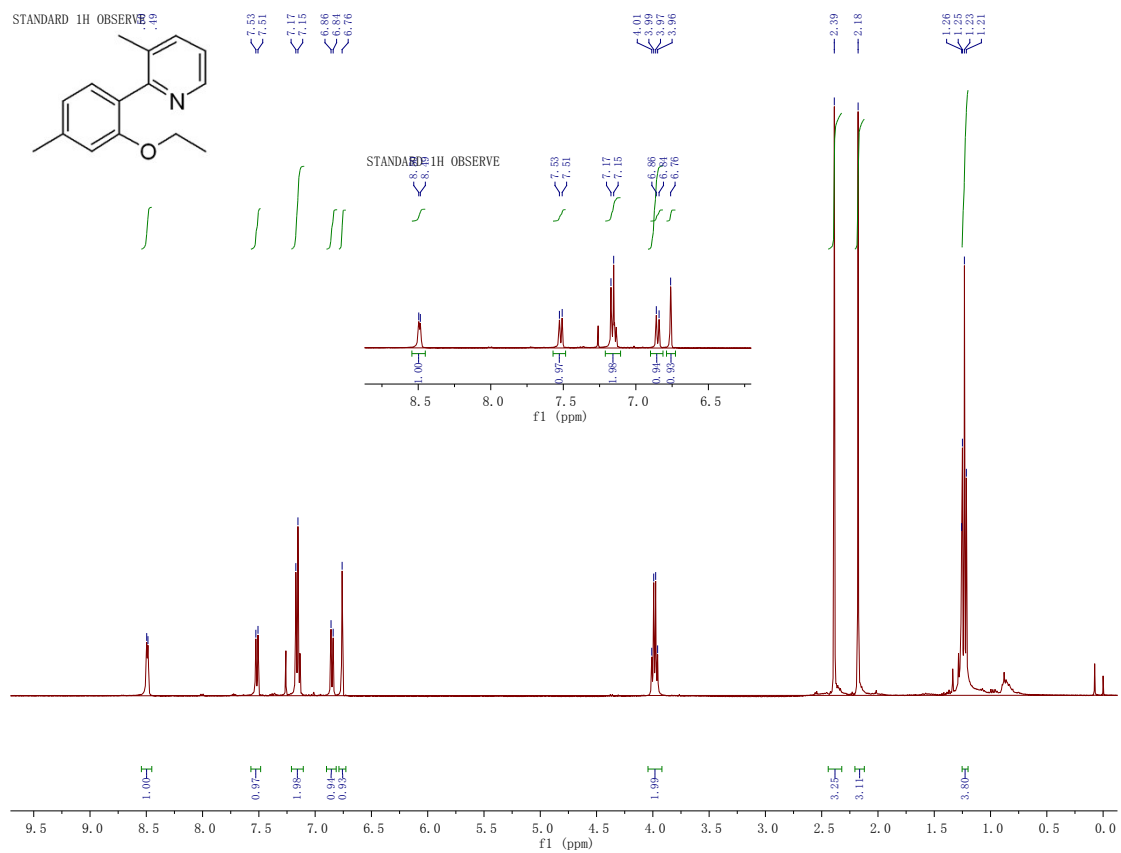

## Compound 5b

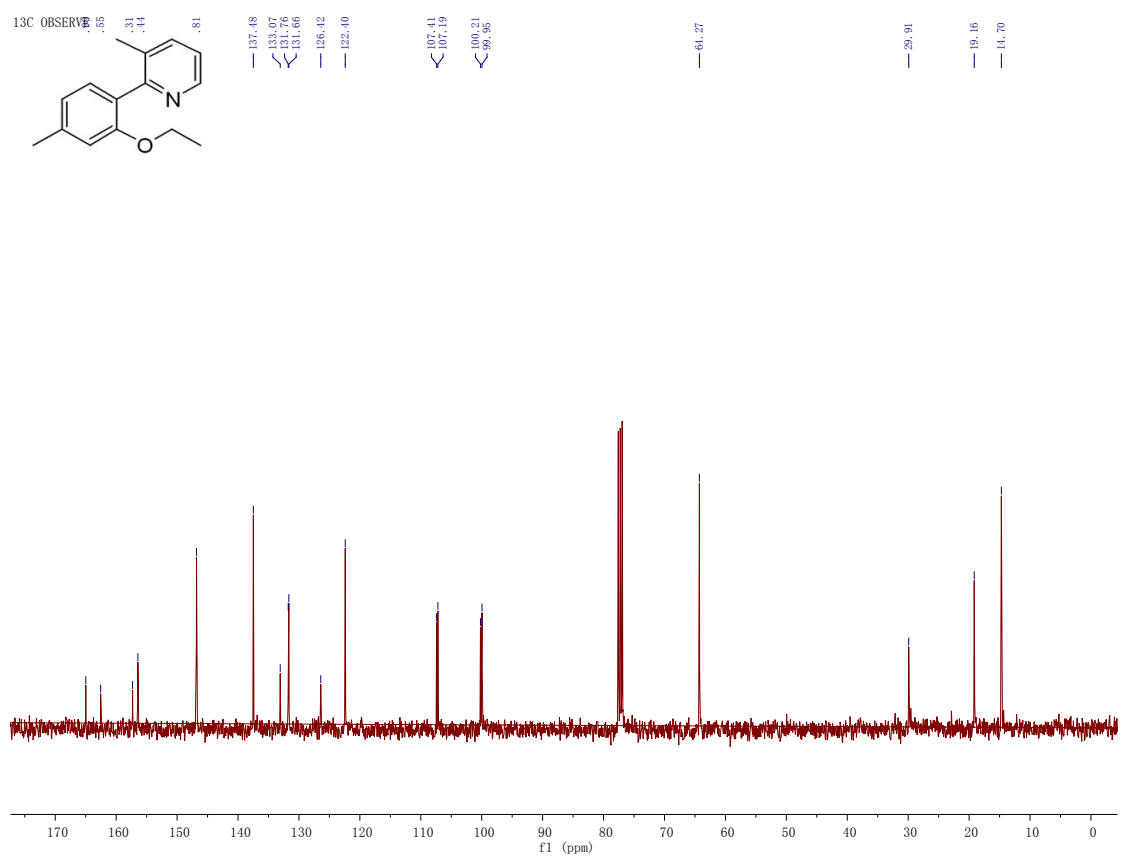

## Compound 5c

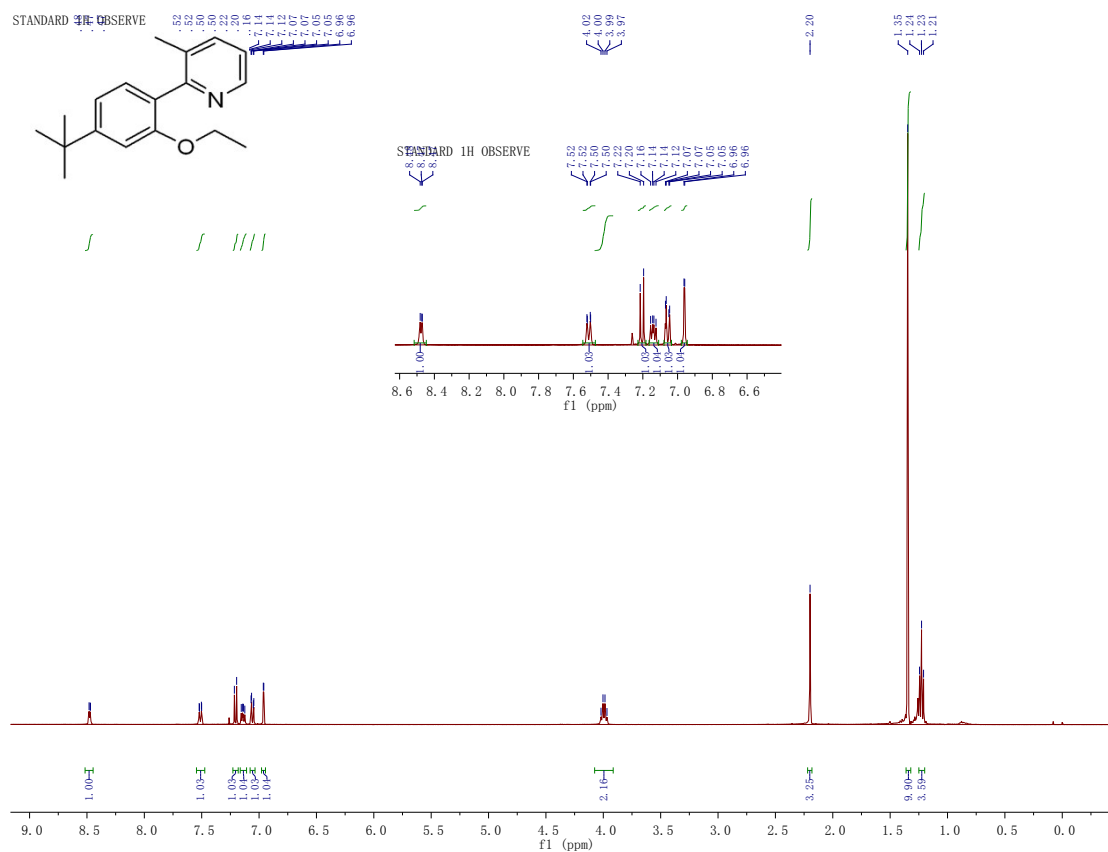

## Compound 5c

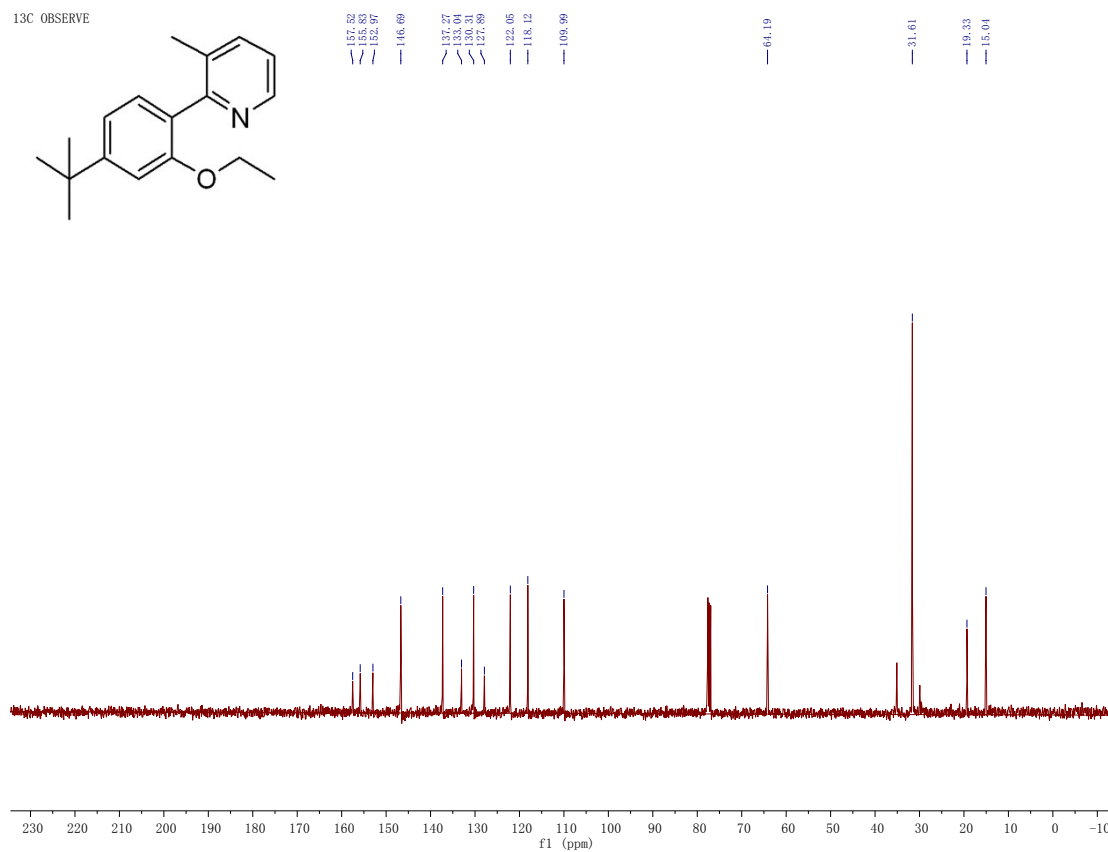

### Compound 5d

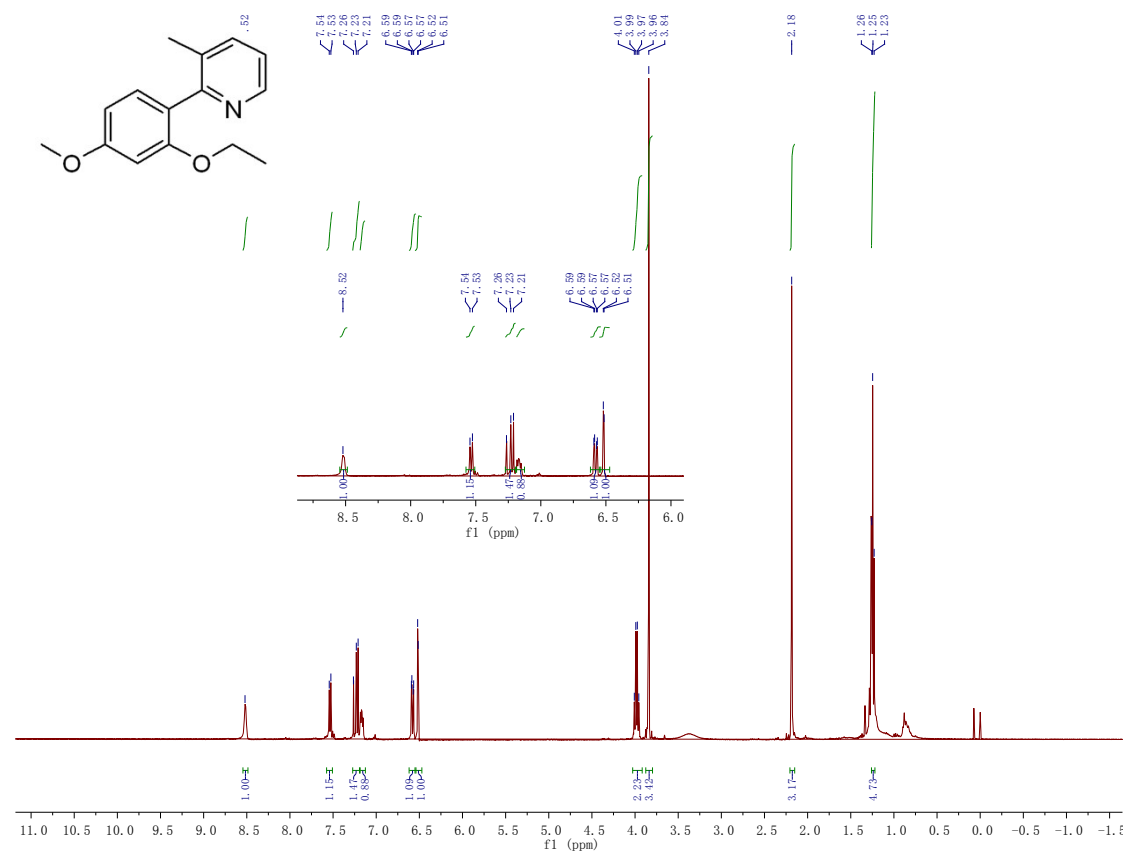

### Compound 5d

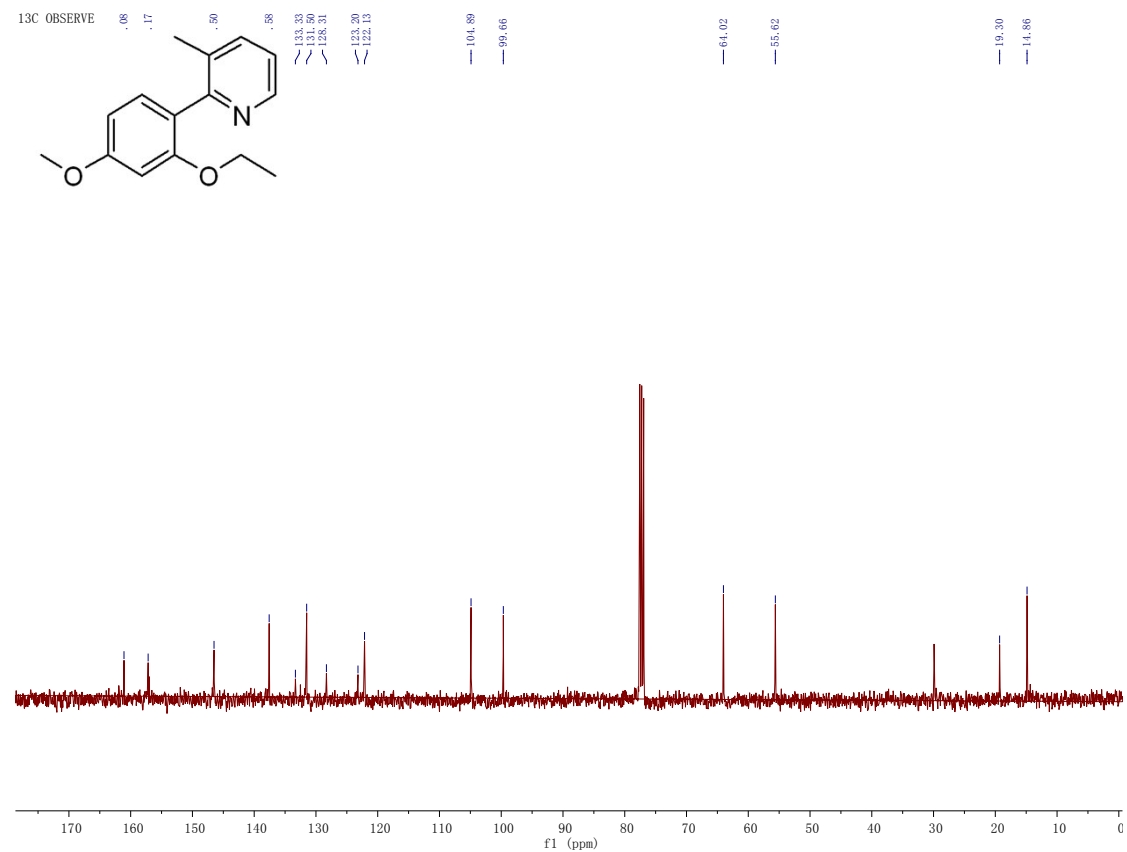

## Compound 5e

STANDARD 1H OBSERVE

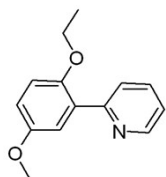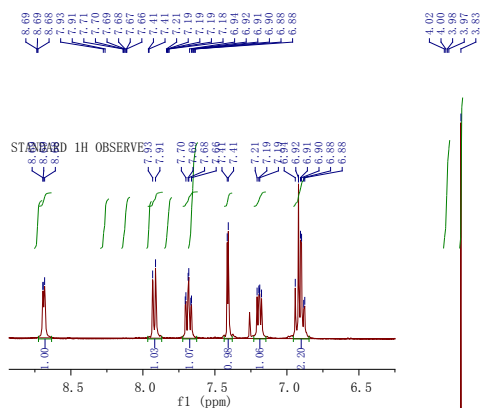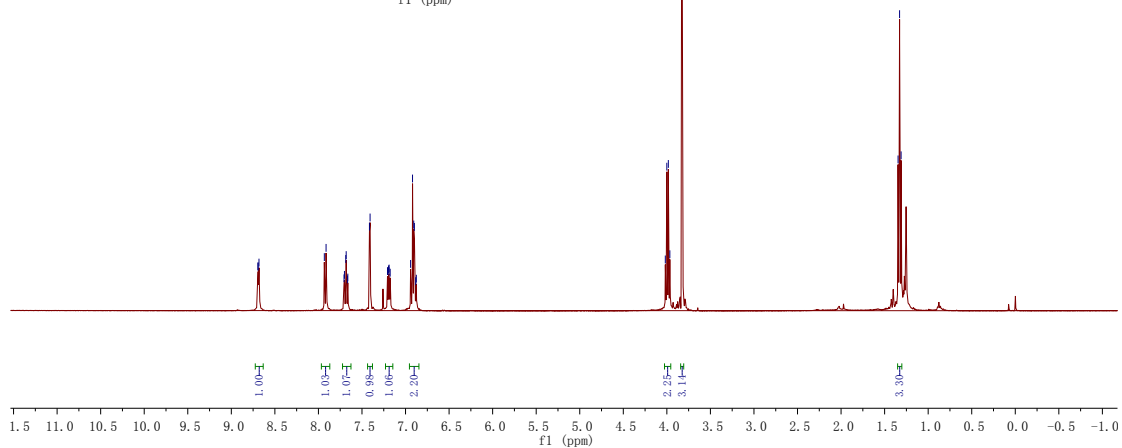

## Compound 5e

13C OBSERVE

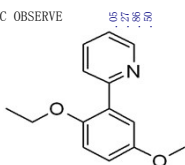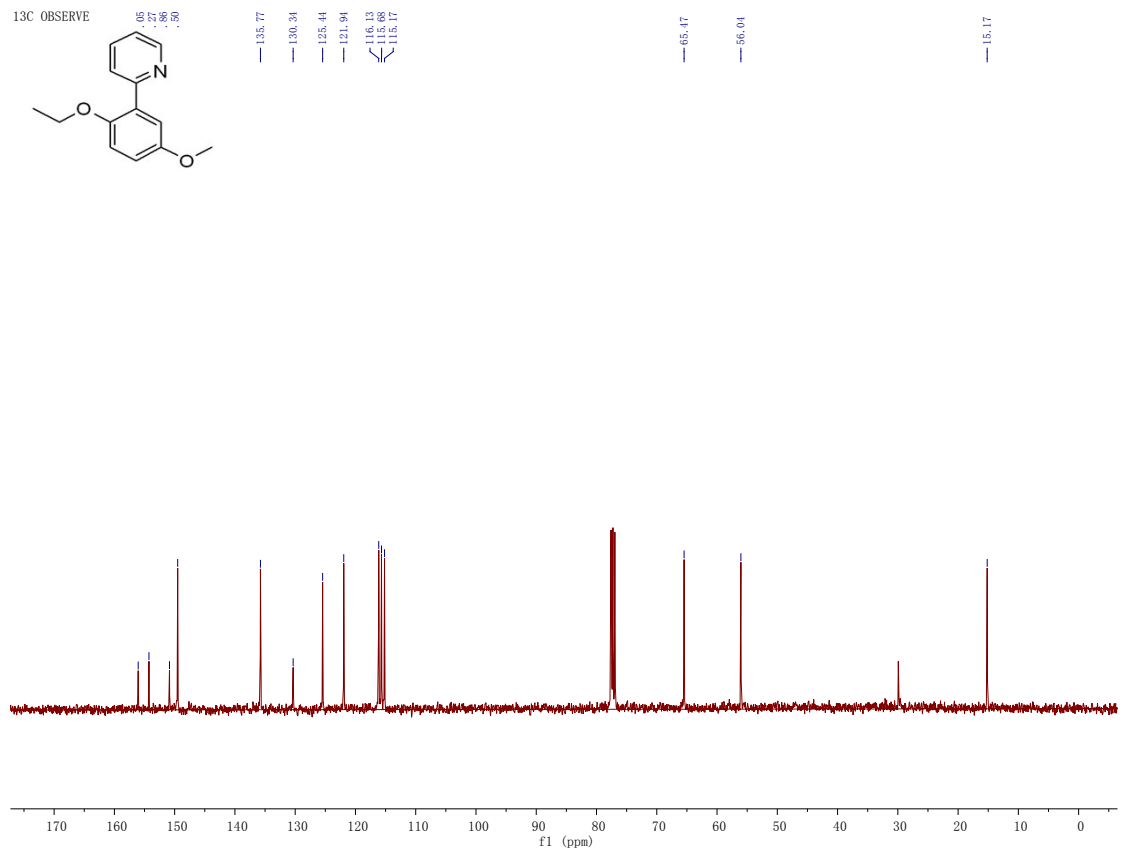

### Compound 5f

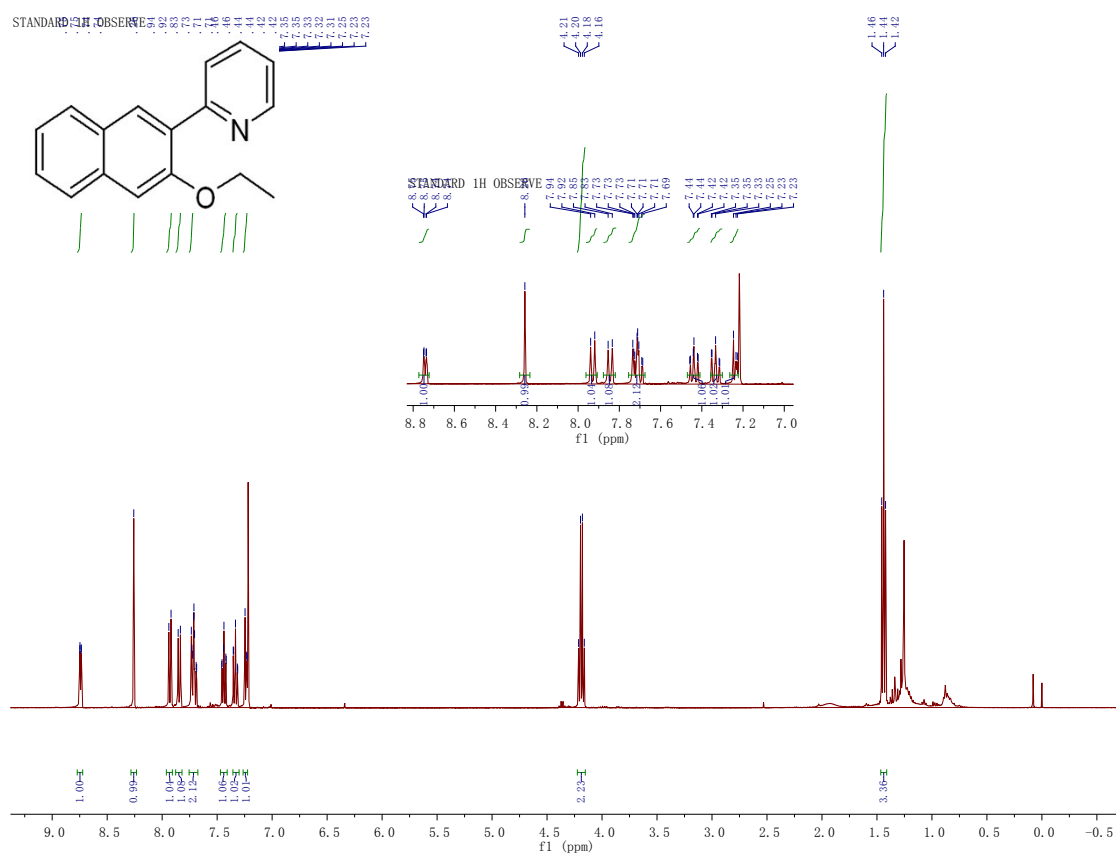

### Compound 5f

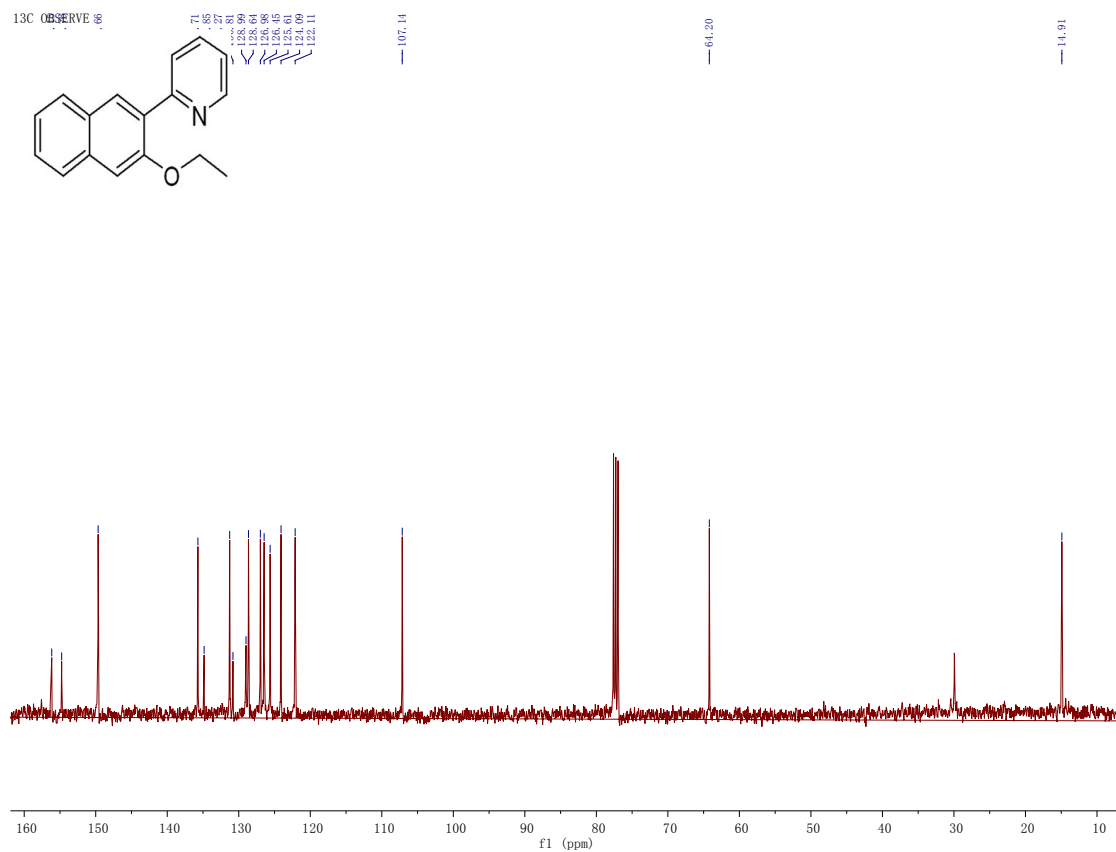



## Compound 5g

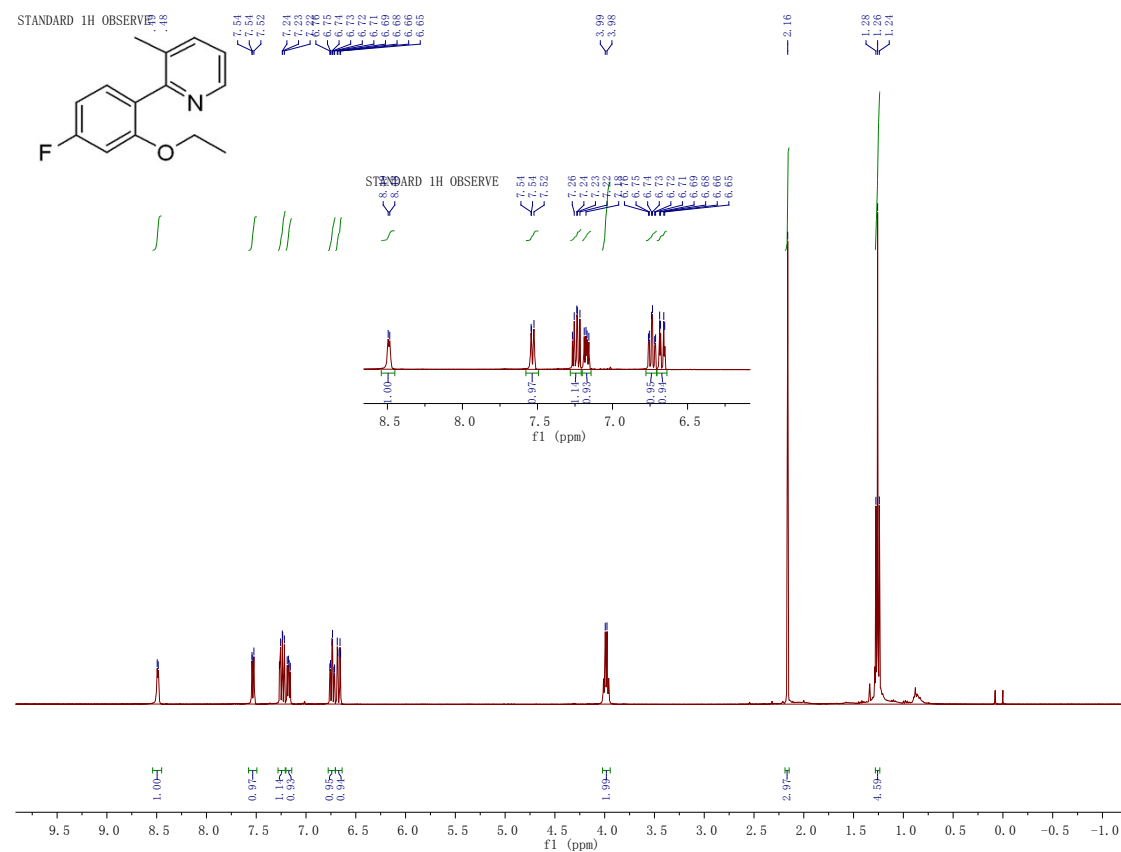

## Compound 5g

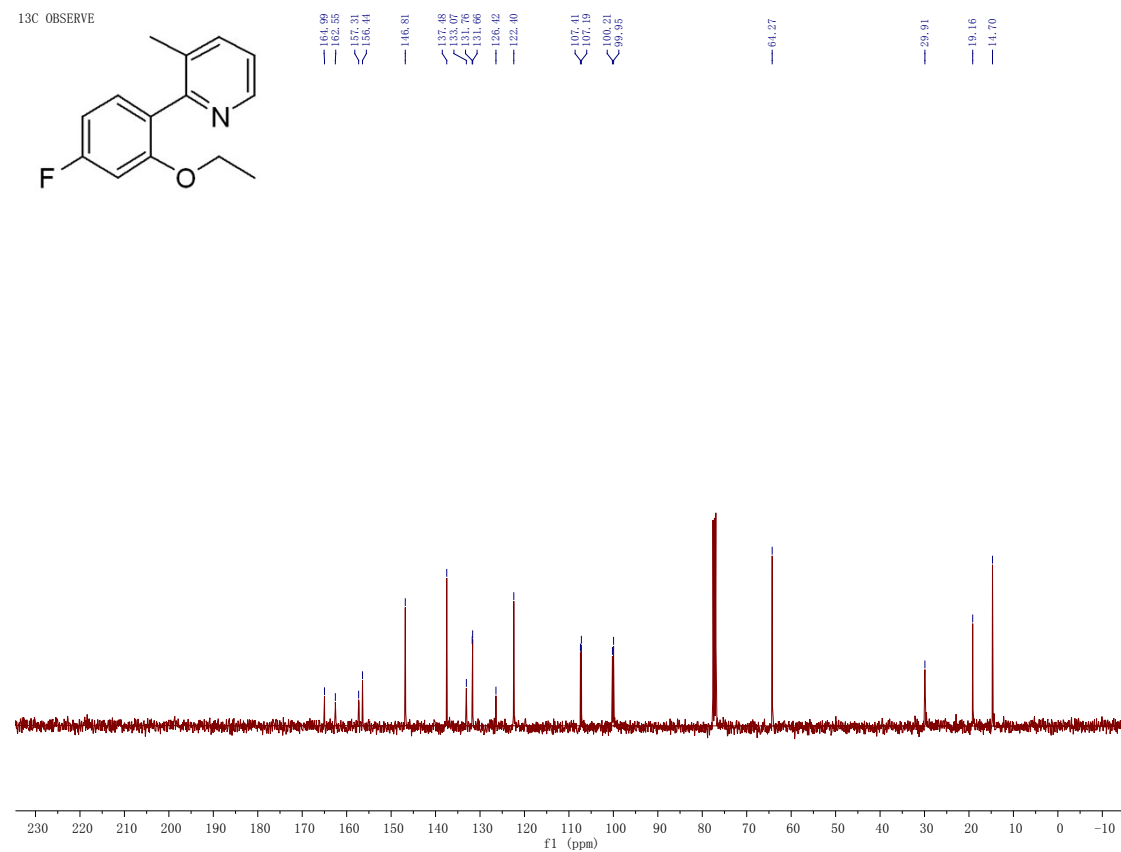



# Compound 5l

STANDARD 1H OBSERVE

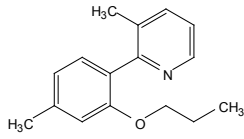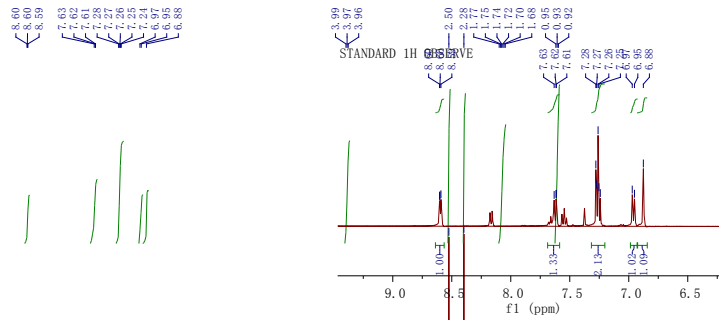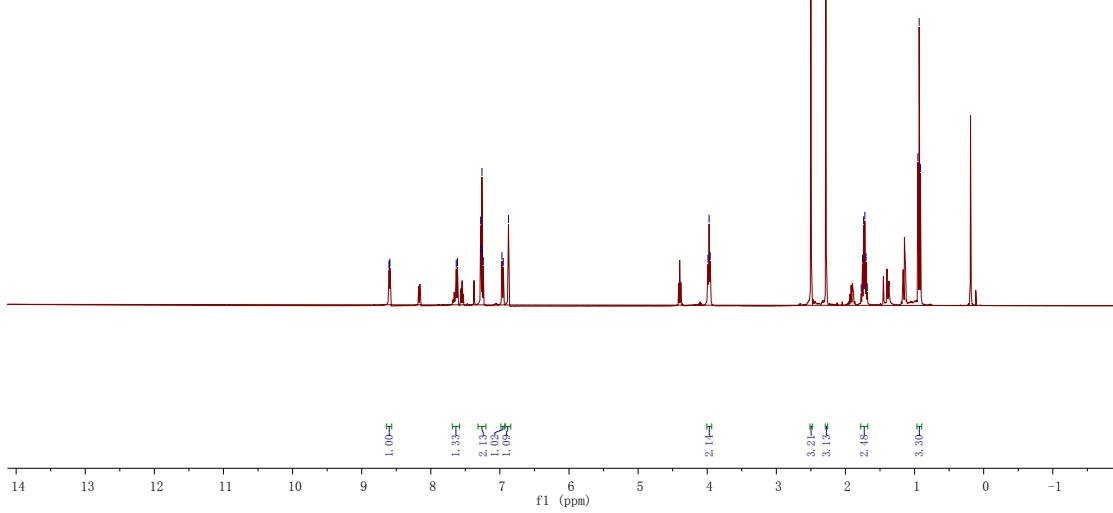

# Compound 5l

xh-4-12a-c13  
13C OBSERVE

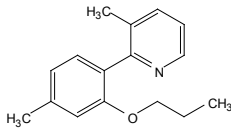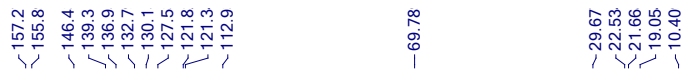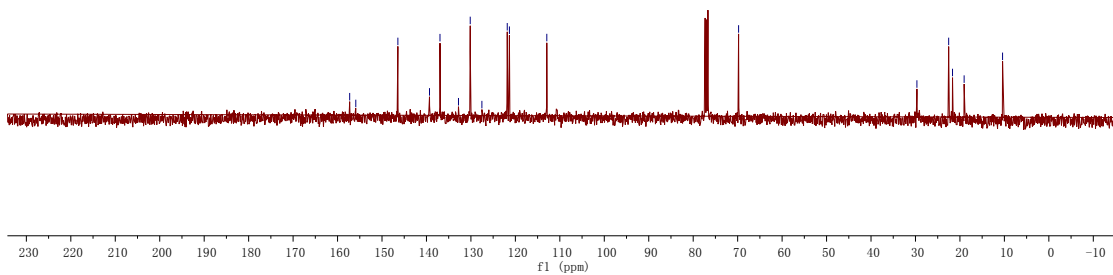

## Compound 5m

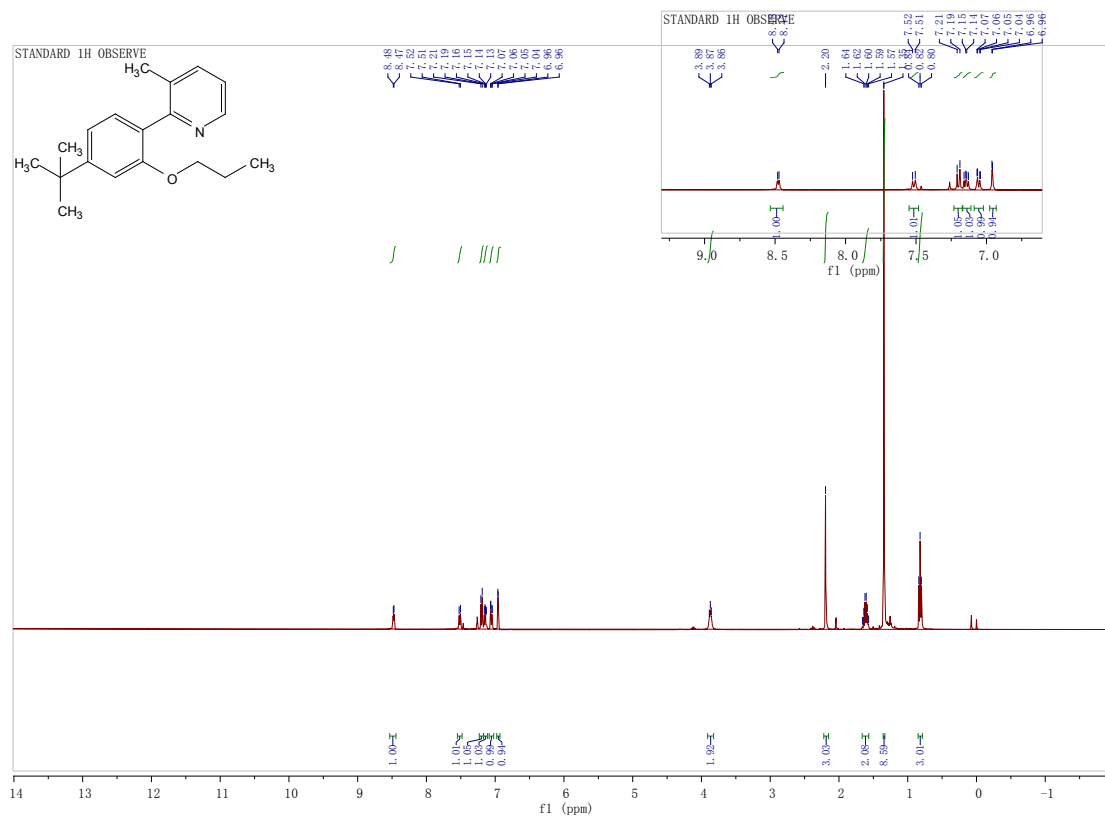

## Compound 5m

xh-4-12b-c13  
13C OBSERVE

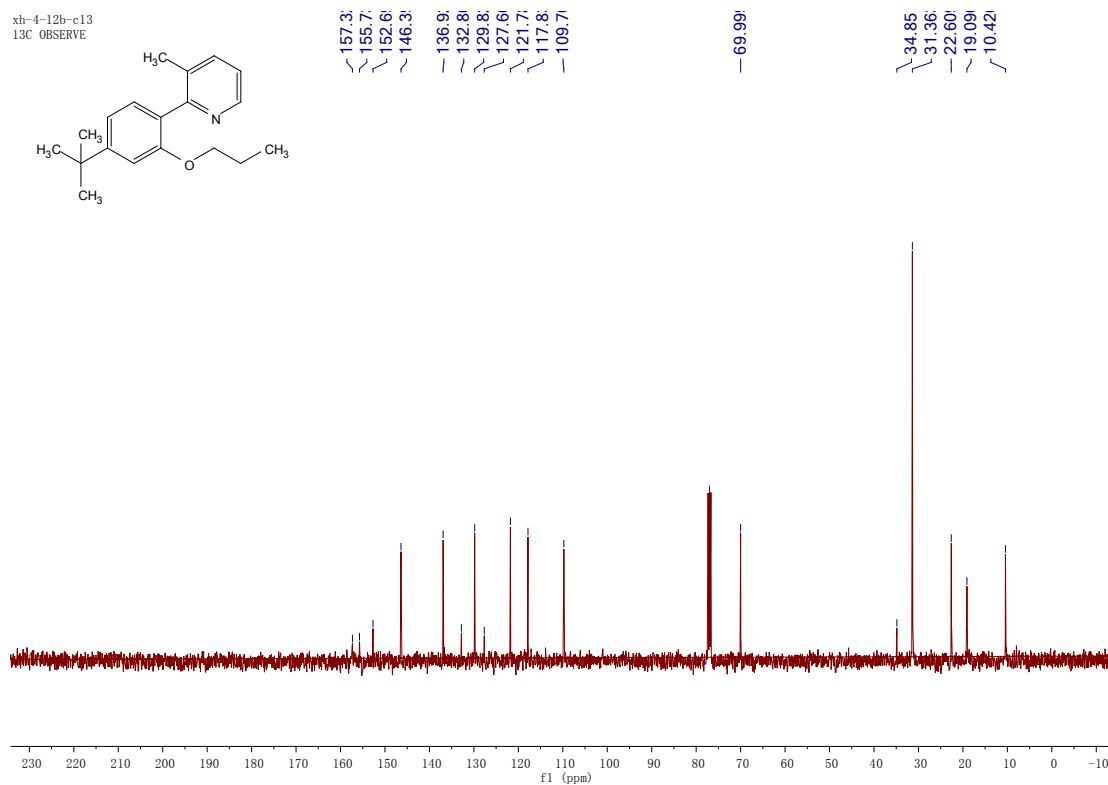

## Compound5n

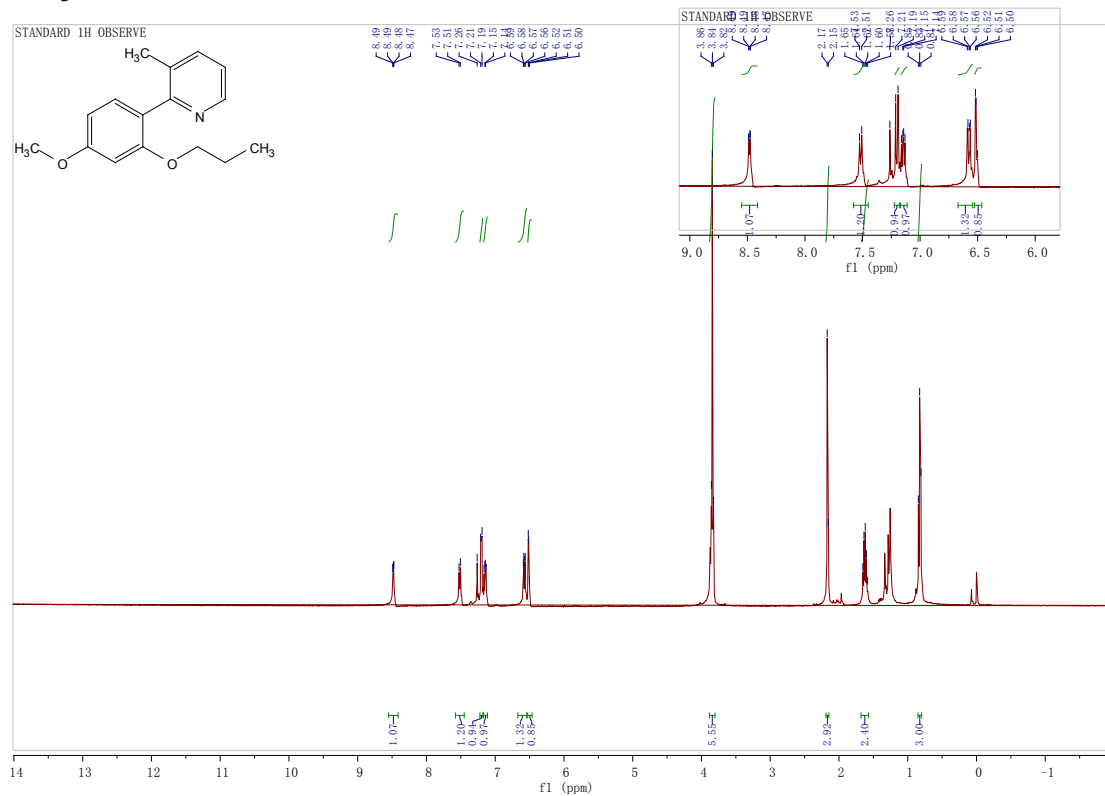

## Compound 5n

xh-4-21b-c13  
13C OBSERVE

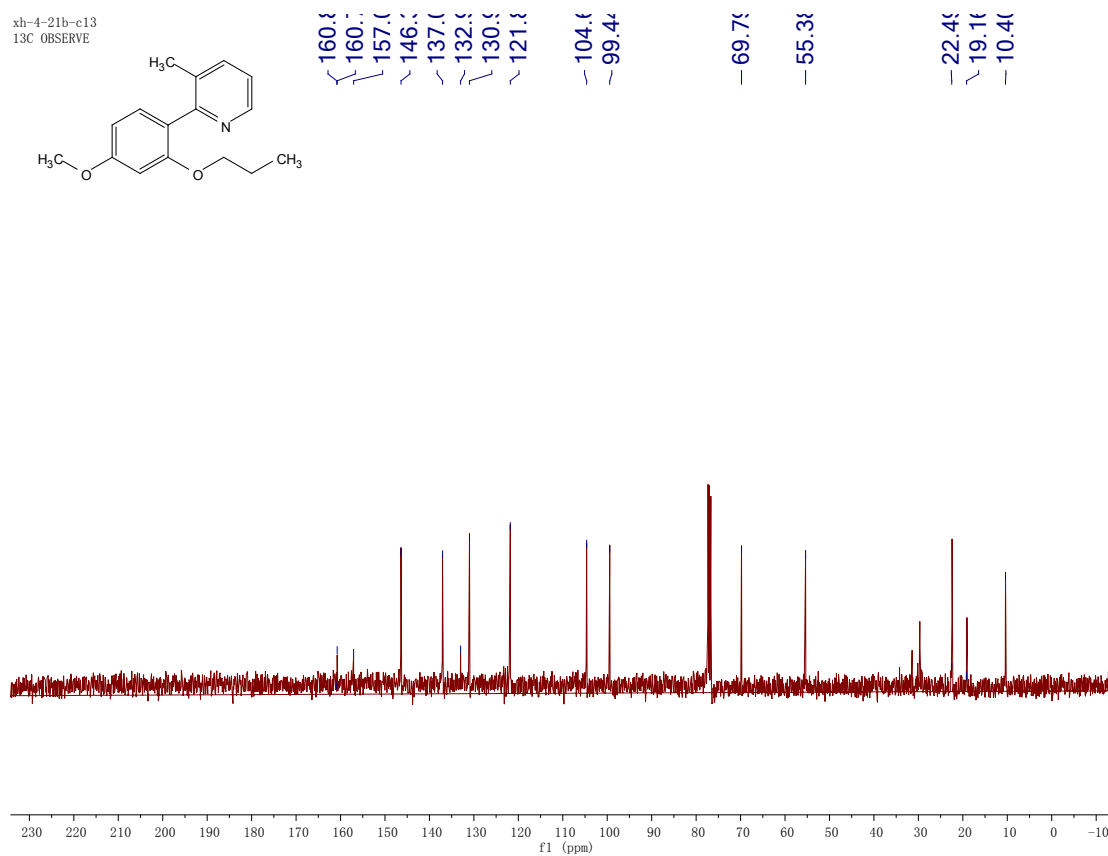

## Compound 5o

STANDARD 1H OBSERVE

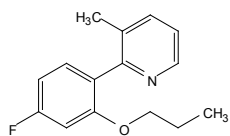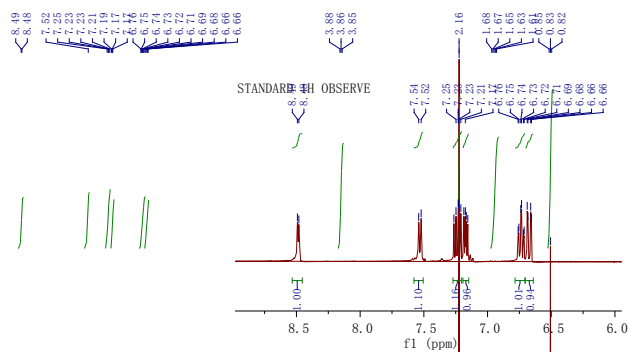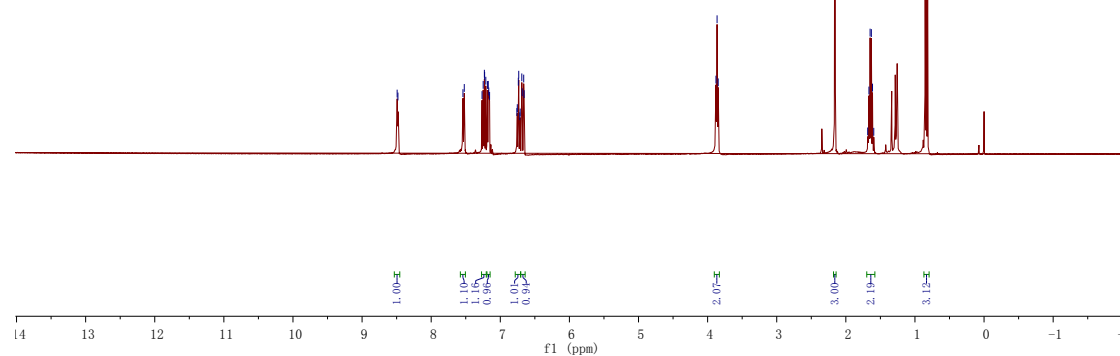

## Compound 5o

xh-4-21a-c13  
13C OBSERVE

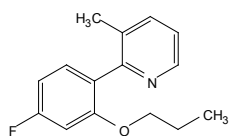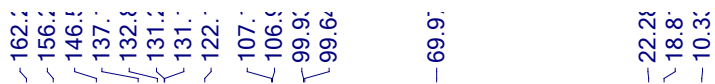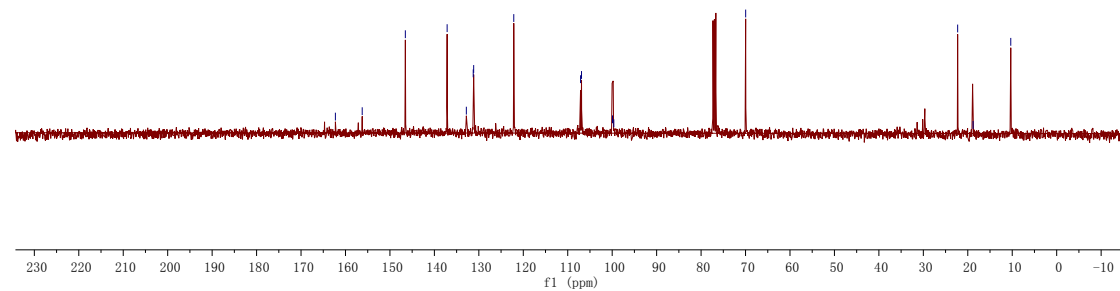



## Compound 5r

STANDARD 1H OBSERVE

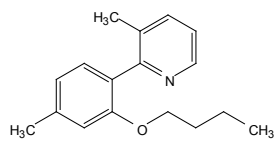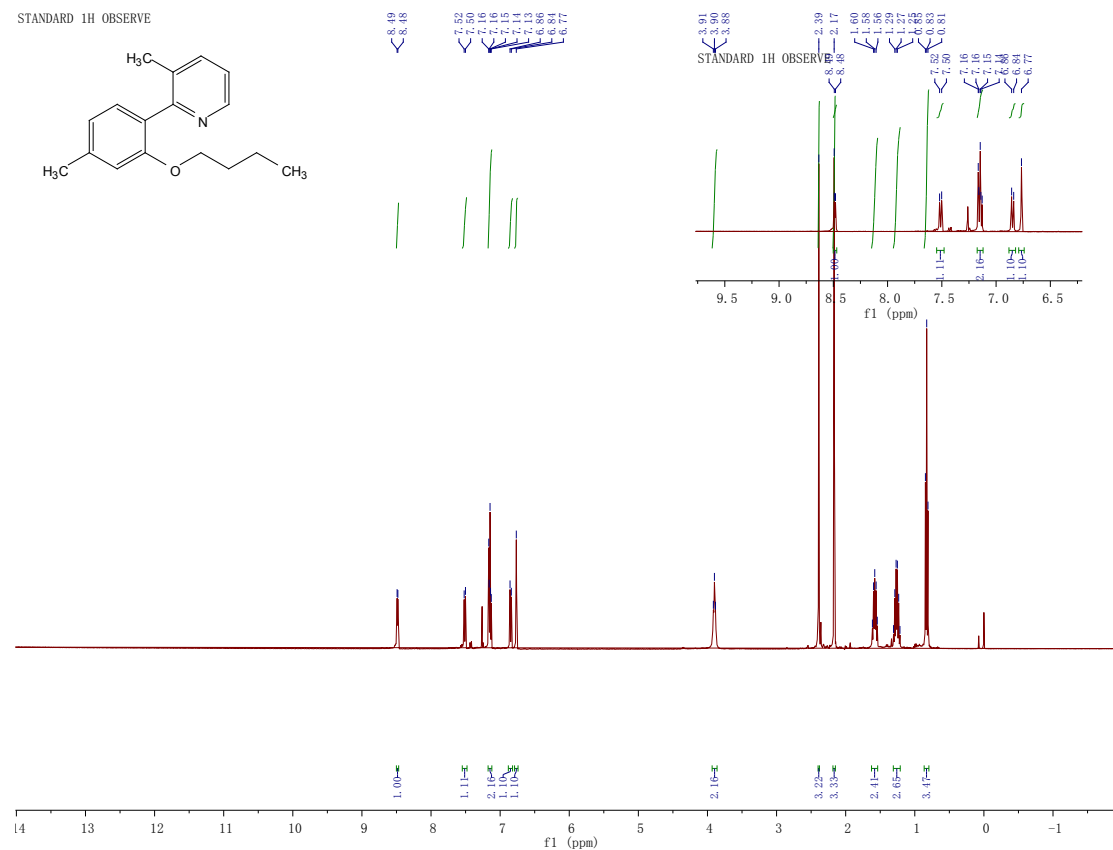

## Compound 5r

xh-4-13a-c13  
13C OBSERVE

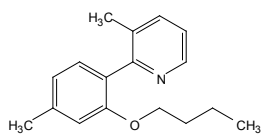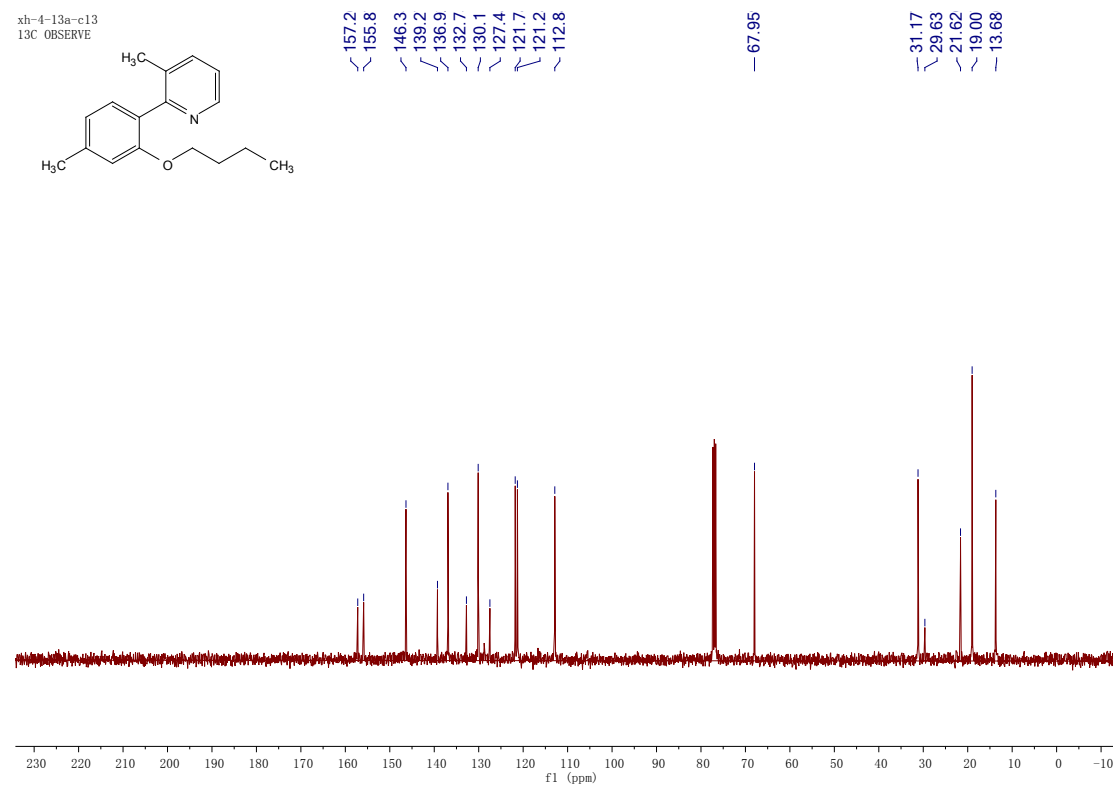



## Compound 5s

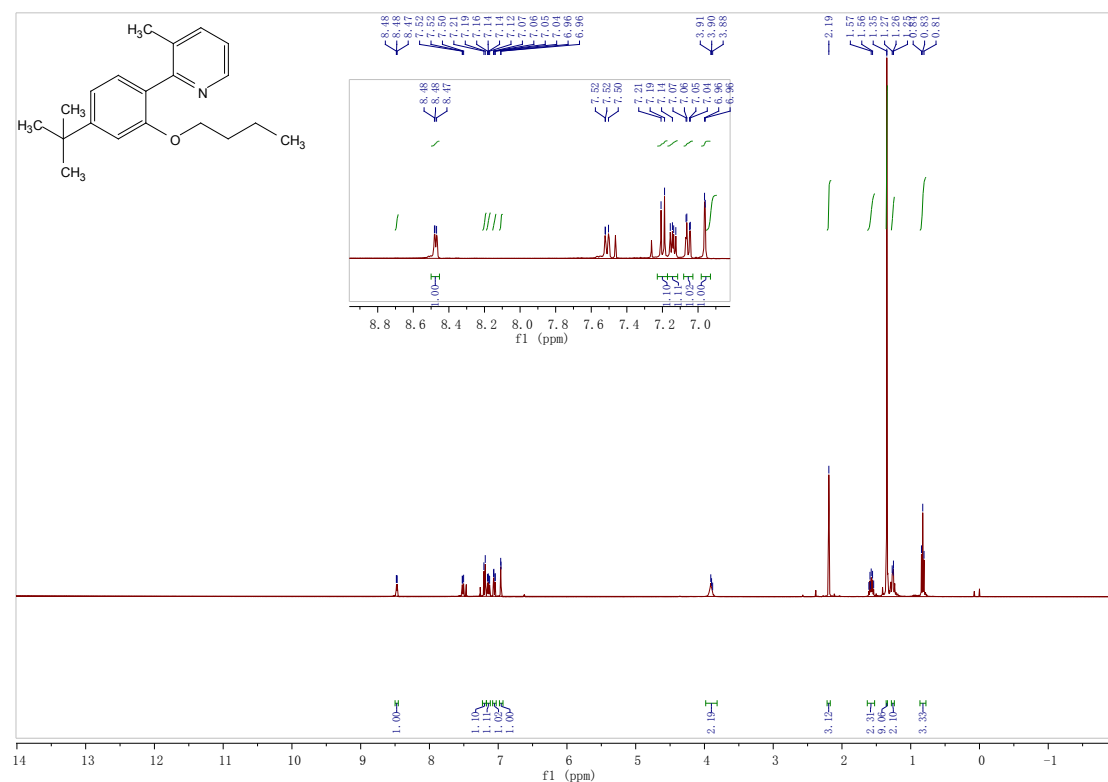

## Compound 5s

xh-4-13b-c13  
13C OBSERVE

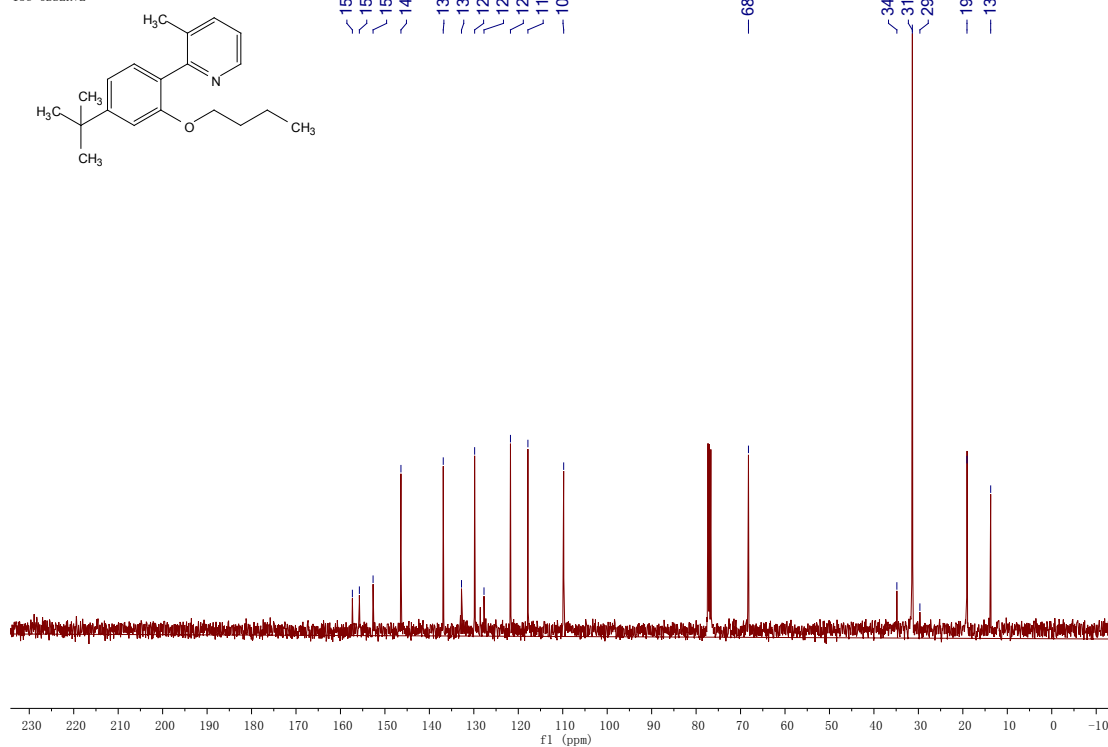

## Compound 5t

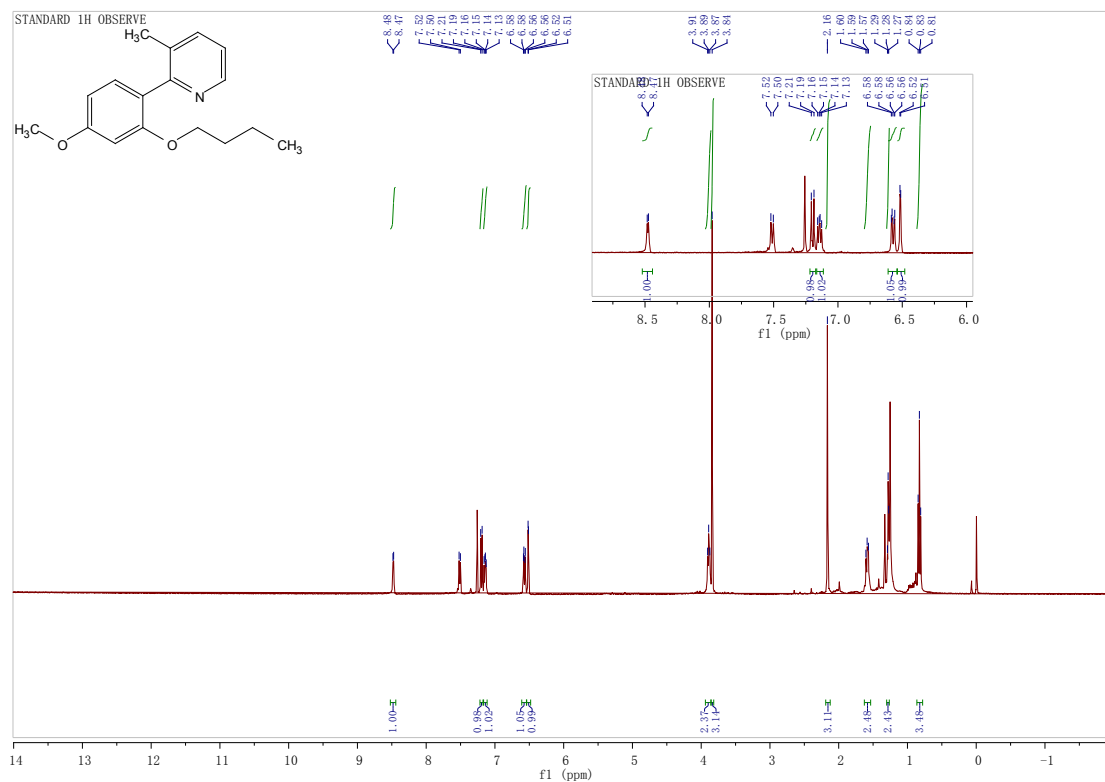

## Compound 5t

xh-4-22-b

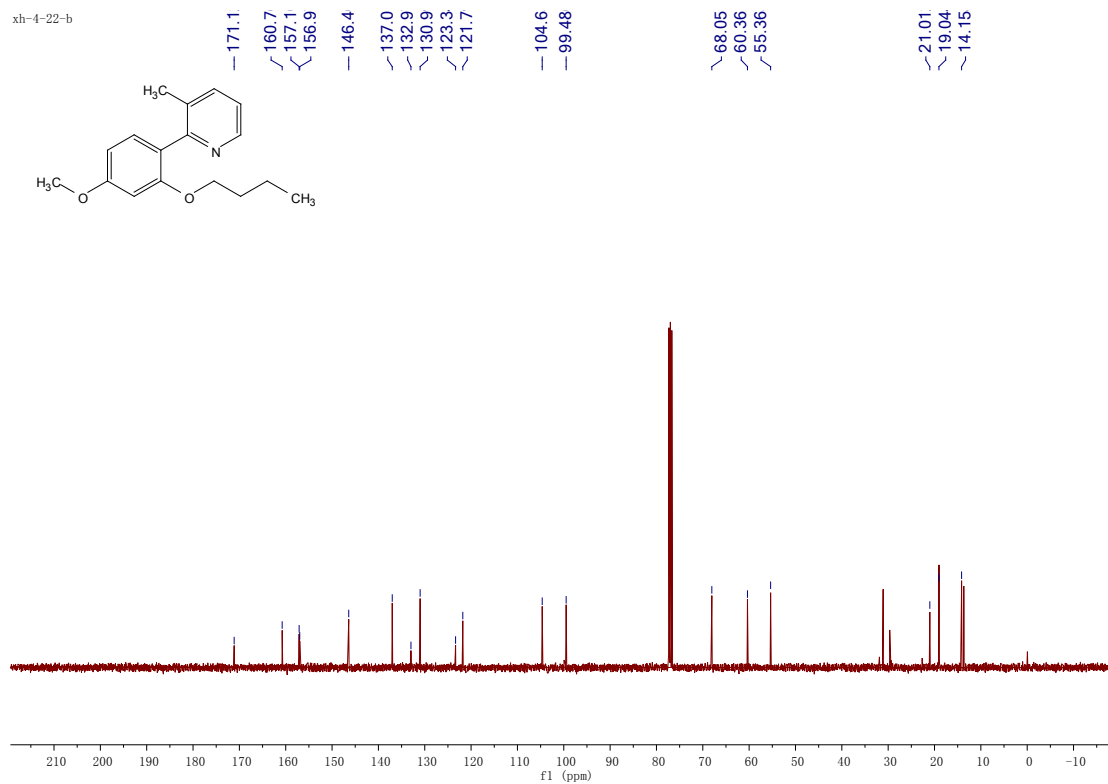

## Compound 5u

STANDARD 1H OBSERVE

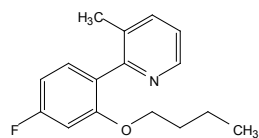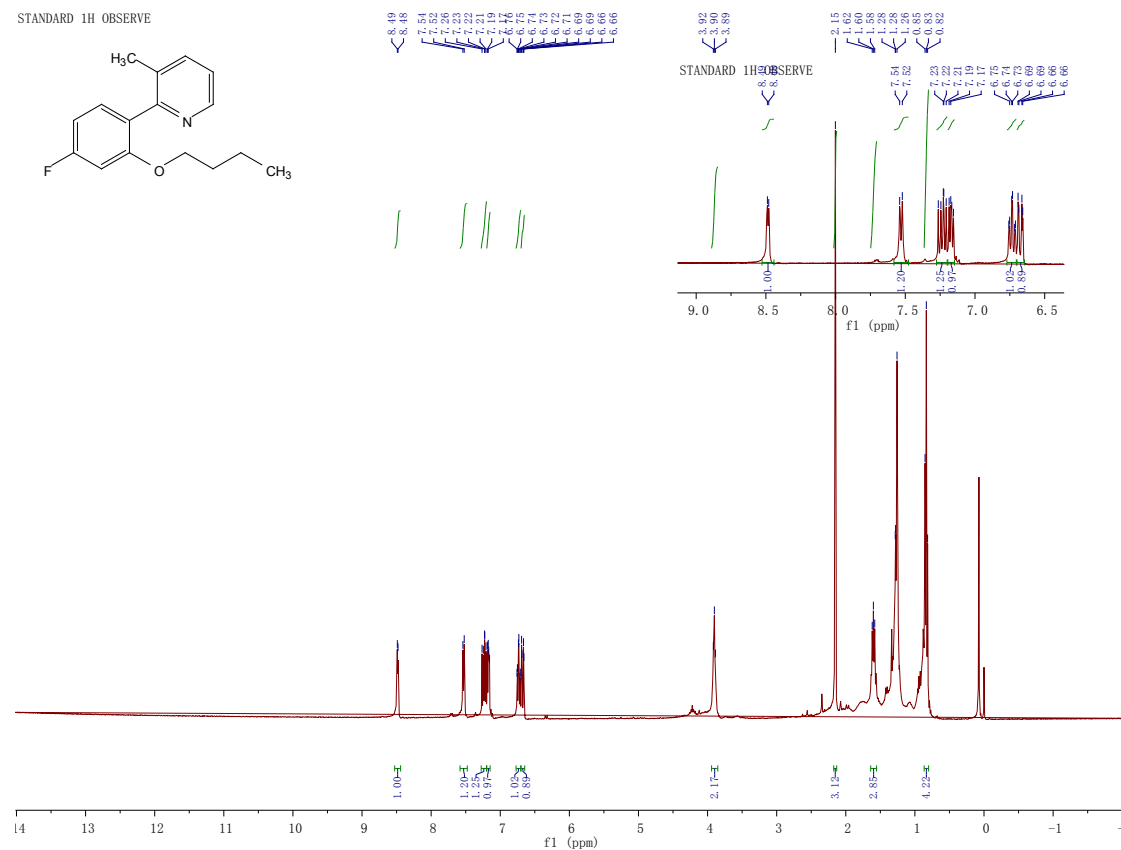

## Compound 5u

xh-4-22a-c13  
13C OBSERVE

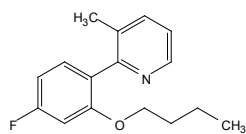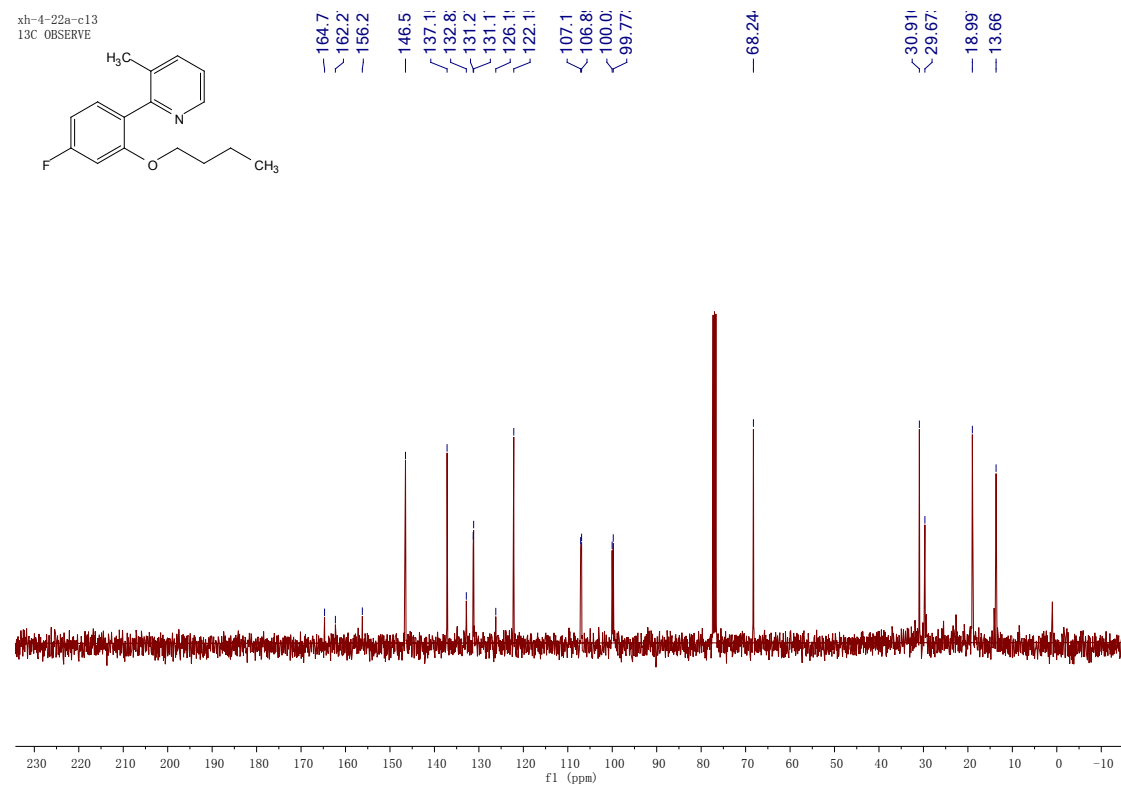

Supplement: c6ob02582j1.pdf [file c6ob02582j1.pdf]
